# Supplementary material for: Chicken embryonic stem cells and primordial germ cells display different heterochromatic histone marks than their mammalian counterparts
Source: Springer Nature journal article supplement (doi:10.1186/s13072-016-0056-6), 2016-02-10
Supplement: MOESM7 [file 13072_2016_56_MOESM7_ESM.pdf]

Table 1

| <b>Gene name</b>     | <b>Gene ID</b> | <b>Forward primer</b>     | <b>Reverse primer</b>    |
|----------------------|----------------|---------------------------|--------------------------|
| <i>BRM/SMARCA2</i>   | 396040         | TGAGTTGCCATCGTGGATTA      | TCCTCCTTCCCAGAATCCTT     |
| <i>BRG1/SMARCA4</i>  | 395932         | CCGCTGGAAGTACATGATTGT     | TCGGATGATCAGAATGGTCTC    |
| <i>HELLS/SMARCA6</i> | 423750         | AAGCTCTGCTGGCAACCTGTGTC   | AGGAACTGCTTGGCACTGTGTCG  |
| <i>SMARCC1</i>       | 420378         | AGGAGGCAGAAGAGAACAAGG     | AGCAACCAGGGACTTGATTTT    |
| <i>SMARCD1</i>       | 426882         | GACCAGACGATCATGAGGAAA     | ATCTTCTAGCAGCCGTCCTTC    |
| <i>CHAF1A</i>        | 770217         | CCAGAAACCAAAGACTCCACAAG   | CGACAGAGGGGAGCTAAGAC     |
| <i>GCN5/KAT2A</i>    | 374232         | CCGCTACCTGGGCTACATC       | GCGCTTGCTTCCTCTCAATC     |
| <i>MYST4/KAT6B</i>   | 423734         | GATGATGGGAACTCAGCCATA     | TCCAATACGCCAGTTTGGTAG    |
| <i>NcoA3/KAT13B</i>  | 419208         | CATGGATTTGTCTCTACCCACTTTC | AGCCACTGTTGTCTGATGTTTTG  |
| <i>HDAC1</i>         | 373961         | CGGATGACCCACAACCTACT      | TCTGTCAGCTCTCTGCTGGA     |
| <i>HDAC2</i>         | 395635         | GGGACATTGGTGCTGGAAAAGGC   | ACAGCACTGGGCTGGTACATCTC  |
| <i>HDAC8</i>         | 422182         | CAGAAATTTGACCGCATCCT      | GCCATCTTGATAGGCACAT      |
| <i>MLL/KMT2A</i>     | 414897         | CCCTGTTCCCCTTACAGAAAC     | TCCTGATCCTAAGACCCCTTTGAG |
| <i>SET7/ KMT7</i>    | 422443         | TTTTCAAAAGTAGCGGCAGAA     | CAAACGGGTCATAGATGCAGT    |
| <i>LSD1/KDM1A</i>    | 419571         | GAGCGGCATGGACTGATTAAC     | CAACCCAGACACACCAGAAC     |
| <i>JAD1B/KDM5B</i>   | 421168         | GGCTCAGGAGTGCAATAAGC      | CTGCCAAACTCCTTTGAAGC     |
| <i>ASH1L/KMT2H</i>   | 425064         | CTGGCACAGATCTTCAAGGAG     | ACATCACGACCAGTTGGAGAC    |
| <i>NSD1/KMT3B</i>    | 416214         | AAAAAGGACAGGCAGCTGAA      | ATGCATGTTTCTCCGGTAGG     |
| <i>KDM2B</i>         | 416844         | GATTCTCTGGTGTGGTGGA       | GTCTAACCACGAATCCGATGA    |
| <i>PRMT3</i>         | 422975         | AGATGTCGGAAGCAGCTCAT      | ATTCCAGTCCACAGCCAAC      |
| <i>JMJD6</i>         | 417355         | TAGAAACCTGCCTTGCTTTGA     | GAGCACAAAAGATGCTTCAGG    |
| <i>SUV39H1/KMT1A</i> | 100857640      | CTCTTCGACCTGGACTACGTG     | CTGCATCTACTGGGTCCACAT    |
| <i>SUV39H2/KMT1B</i> | 426314         | GACGAGGCCAATTCTATGACA     | CCTTGATGGTCTTGTGGAAA     |
| <i>EHMT1/KMT1D</i>   | 417250         | TGCGCTGCTGGTATGATAAG      | GGATATCAGCTCGCCAACAT     |
| <i>KDM3A</i>         | 422917         | AAAGCCTTCACCAGGAGTAT      | AGGCTGGATTCTGTAGCTCTC    |
| <i>KDM4A</i>         | 424571         | GGCAGATAGTCATCAGCAAGC     | ACCTGTCCATCTGTCCATCTG    |
| <i>KDM4B</i>         | 428354         | GCCAAGTTTATTGCAGCTCAG     | CTTGGCTGCTCTCATTTTCATC   |
| <i>KDM4C</i>         | 427231         | TGAAGTGCCAGCAACGTAATTC    | TCACCATGTCCCACCCATTTTC   |
| <i>EZH1/KMT6B</i>    | 420023         | AGACTGCTGGGAACAAAGACA     | TCAGCTGAATCTTCCTGCAAT    |
| <i>EZH2/KMT6A</i>    | 420784         | AGGAGCTCTTCTCCTGAATG      | TTCGGTGGTGTCTTTATACGC    |
| <i>SUZ12</i>         | 417406         | ACCTCTCCGTCCACAAGAAAT     | GCAATAAACCCTGCTTCATA     |
| <i>EED</i>           | 426381         | GCAGGGTCCAGGGGATTAT       | TCATCCCTGTGCCCTTCTAC     |
| <i>JARID2</i>        | 420839         | TAAGGAGGTGGGAGACAGTT      | GCATTTTCAGTTTTGCCATGT    |
| <i>CDYL</i>          | 420877         | TTAGCAGCCAATGGTACAACC     | GTGCGTGAATCCATCTTGTTT    |
| <i>UTX/KDM6A</i>     | 418556         | CCTCACCATCTTCAGCCATT      | ACTTCTGCTGAGCTGGGGTA     |
| <i>JHDM1D/KDM7A</i>  | 418110         | CTGGAACACGGACCTTTGTTA     | TCACCACCTACATAGCGTTCC    |
| <i>RING1B/RNF2</i>   | 424452         | CCAAGCCGTGACGAATATGAAG    | GTTTCTTGCCCTCTGTAACC     |
| <i>BMI1</i>          | 493647         | TGAAGACAGGGGAGAAGTGG      | ACTCCGCAGGAACCTTCGTA     |
| <i>RYBP</i>          | 374237         | CCACCACCACCAAGAAG         | TGACGCTGGGACTGATCTC      |
| <i>CBX1</i>          | 374237         | CCAAGGAAGCCAACATCAAGTG    | GCGGGTGCCAGTTTTAG        |
| <i>CBX7</i>          | 101752246      | GACCCTCGCCTGGTAGTG        | GTAGGAGGCGCTTTGGTTTG     |
| <i>CBX8</i>          | 422084         | GAGCGAGAAATGGAGCTATTCG    | CTGCGGAACTCATAGTTTGG     |
| <i>DNMT3A</i>        | 421991         | CTGTCCCTGCTGAAAAGAGG      | GCCCCACTCCTGTATGTGTT     |
| <i>DNMT3B</i>        | 419287         | GCTGAAGCCCATGATTGATT      | ACCATTTGTTCTCGGGTCTG     |
| <i>DNMT1</i>         | 770153         | CTGCGCATCTGGAAGTTCTAC     | GATCCTCGAAGCTCTTCGTTT    |
| <i>MBD3</i>          | 770153         | CAGCCTGTCAAAAGATCACA      | AGAAGGGTCTCATCAGTGCAA    |
| <i>TET1</i>          | 423690         | GCGTCGCTGTGGCACCTTCT      | CCGCGTGGGATGATTGCGGT     |
| <i>TET2</i>          | 422540         | CACAGAGCGCCCGAGTGTCG      | GGGCGCAGAAGTCCAGGCAG     |
| <i>TET3</i>          | 425829         | CGGCGAGAAGGGCAAAGCCA      | CCCCTTGCGATGGGGCAG       |
